# Supplementary material for: Parameterizing microphysical effects on variances and covariances of moisture and heat content using a multivariate PDF
Source: Copernicus journal article supplement (doi:10.5194/gmd-2016-113), 2016-06-02
Supplement: Supplementary file 1 [file gmd-2016-113-supplement.pdf]

# S1 Functional Form of a Quadrivariate PDF

There is one type of quadrivariate PDF used in the equation set. It is quadrivariate normal-normal-lognormal-lognormal distribution, meaning that the individual marginal of  $x_1$  is a normal distribution, the individual marginal of  $x_2$  is a normal distribution, the individual marginal of  $x_3$  is a lognormal distribution, and the individual marginal of  $x_4$  is a lognormal distribution. The functional form of this type of PDF is given by:

$$P_{NNLL(i)}(x_1, x_2, x_3, x_4) = \frac{\exp\left\{-\frac{1}{2}\lambda_{NNLL}\right\}}{(2\pi)^2 \sigma_{x_1(i)} \sigma_{x_2(i)} \tilde{\sigma}_{x_3(i)} \tilde{\sigma}_{x_4(i)} C_{Q1} x_3 x_4}; \quad (\text{S1})$$

where:

$$\begin{aligned} \lambda_{NNLL} = \frac{1}{C_{Q1}^2} & \left[ C_{Q2} (x_1 - \mu_{x_1(i)})^2 + C_{Q3} (x_2 - \mu_{x_2(i)})^2 + C_{Q4} (\ln x_3 - \tilde{\mu}_{x_3(i)})^2 \right. \\ & + C_{Q5} (\ln x_4 - \tilde{\mu}_{x_4(i)})^2 + C_{Q6} (x_1 - \mu_{x_1(i)}) (x_2 - \mu_{x_2(i)}) \\ & + C_{Q7} (x_1 - \mu_{x_1(i)}) (\ln x_3 - \tilde{\mu}_{x_3(i)}) + C_{Q8} (x_1 - \mu_{x_1(i)}) (\ln x_4 - \tilde{\mu}_{x_4(i)}) \\ & + C_{Q9} (x_2 - \mu_{x_2(i)}) (\ln x_3 - \tilde{\mu}_{x_3(i)}) + C_{Q10} (x_2 - \mu_{x_2(i)}) (\ln x_4 - \tilde{\mu}_{x_4(i)}) \\ & \left. + C_{Q11} (\ln x_3 - \tilde{\mu}_{x_3(i)}) (\ln x_4 - \tilde{\mu}_{x_4(i)}) \right]; \end{aligned}$$

and where:

$$\begin{aligned} C_{Q1} = & \left[ 1 - (\rho_{x_1, x_2(i)}^2 + \tilde{\rho}_{x_1, x_3(i)}^2 + \tilde{\rho}_{x_1, x_4(i)}^2 + \tilde{\rho}_{x_2, x_3(i)}^2 + \tilde{\rho}_{x_2, x_4(i)}^2 + \tilde{\rho}_{x_3, x_4(i)}^2) \right. \\ & + 2\rho_{x_1, x_2(i)} \tilde{\rho}_{x_1, x_3(i)} \tilde{\rho}_{x_2, x_3(i)} + 2\rho_{x_1, x_2(i)} \tilde{\rho}_{x_1, x_4(i)} \tilde{\rho}_{x_2, x_4(i)} \\ & + 2\tilde{\rho}_{x_1, x_3(i)} \tilde{\rho}_{x_1, x_4(i)} \tilde{\rho}_{x_3, x_4(i)} + 2\tilde{\rho}_{x_2, x_3(i)} \tilde{\rho}_{x_2, x_4(i)} \tilde{\rho}_{x_3, x_4(i)} + \rho_{x_1, x_2(i)}^2 \tilde{\rho}_{x_3, x_4(i)}^2 \\ & + \tilde{\rho}_{x_1, x_3(i)}^2 \tilde{\rho}_{x_2, x_4(i)}^2 + \tilde{\rho}_{x_1, x_4(i)}^2 \tilde{\rho}_{x_2, x_3(i)}^2 - 2\rho_{x_1, x_2(i)} \tilde{\rho}_{x_1, x_3(i)} \tilde{\rho}_{x_2, x_4(i)} \tilde{\rho}_{x_3, x_4(i)} \\ & \left. - 2\rho_{x_1, x_2(i)} \tilde{\rho}_{x_1, x_4(i)} \tilde{\rho}_{x_2, x_3(i)} \tilde{\rho}_{x_3, x_4(i)} - 2\tilde{\rho}_{x_1, x_3(i)} \tilde{\rho}_{x_1, x_4(i)} \tilde{\rho}_{x_2, x_3(i)} \tilde{\rho}_{x_2, x_4(i)} \right]^{\frac{1}{2}}; \\ C_{Q2} = & \frac{1}{\sigma_{x_1(i)}^2} \left[ 1 - (\tilde{\rho}_{x_2, x_3(i)}^2 + \tilde{\rho}_{x_2, x_4(i)}^2 + \tilde{\rho}_{x_3, x_4(i)}^2) + 2\tilde{\rho}_{x_2, x_3(i)} \tilde{\rho}_{x_2, x_4(i)} \tilde{\rho}_{x_3, x_4(i)} \right]; \end{aligned}$$

$$\begin{aligned}
C_{Q3} &= \frac{1}{\sigma_{x_2(i)}^2} \left[ 1 - (\tilde{\rho}_{x_1,x_3(i)}^2 + \tilde{\rho}_{x_1,x_4(i)}^2 + \tilde{\rho}_{x_3,x_4(i)}^2) + 2\tilde{\rho}_{x_1,x_3(i)}\tilde{\rho}_{x_1,x_4(i)}\tilde{\rho}_{x_3,x_4(i)} \right]; \\
C_{Q4} &= \frac{1}{\tilde{\sigma}_{x_3(i)}^2} \left[ 1 - (\rho_{x_1,x_2(i)}^2 + \tilde{\rho}_{x_1,x_4(i)}^2 + \tilde{\rho}_{x_2,x_4(i)}^2) + 2\rho_{x_1,x_2(i)}\tilde{\rho}_{x_1,x_4(i)}\tilde{\rho}_{x_2,x_4(i)} \right]; \\
C_{Q5} &= \frac{1}{\tilde{\sigma}_{x_4(i)}^2} \left[ 1 - (\rho_{x_1,x_2(i)}^2 + \tilde{\rho}_{x_1,x_3(i)}^2 + \tilde{\rho}_{x_2,x_3(i)}^2) + 2\rho_{x_1,x_2(i)}\tilde{\rho}_{x_1,x_3(i)}\tilde{\rho}_{x_2,x_3(i)} \right]; \\
C_{Q6} &= \frac{2}{\sigma_{x_1(i)}\sigma_{x_2(i)}} \left( \rho_{x_1,x_2(i)}\tilde{\rho}_{x_3,x_4(i)}^2 - \tilde{\rho}_{x_1,x_4(i)}\tilde{\rho}_{x_2,x_3(i)}\tilde{\rho}_{x_3,x_4(i)} \right. \\
&\quad \left. - \tilde{\rho}_{x_1,x_3(i)}\tilde{\rho}_{x_2,x_4(i)}\tilde{\rho}_{x_3,x_4(i)} + \tilde{\rho}_{x_1,x_3(i)}\tilde{\rho}_{x_2,x_3(i)} + \tilde{\rho}_{x_1,x_4(i)}\tilde{\rho}_{x_2,x_4(i)} \right. \\
&\quad \left. - \rho_{x_1,x_2(i)} \right); \\
C_{Q7} &= \frac{2}{\sigma_{x_1(i)}\tilde{\sigma}_{x_3(i)}} \left( \tilde{\rho}_{x_1,x_3(i)}\tilde{\rho}_{x_2,x_4(i)}^2 - \rho_{x_1,x_2(i)}\tilde{\rho}_{x_2,x_4(i)}\tilde{\rho}_{x_3,x_4(i)} \right. \\
&\quad \left. - \tilde{\rho}_{x_1,x_4(i)}\tilde{\rho}_{x_2,x_3(i)}\tilde{\rho}_{x_2,x_4(i)} + \rho_{x_1,x_2(i)}\tilde{\rho}_{x_2,x_3(i)} + \tilde{\rho}_{x_1,x_4(i)}\tilde{\rho}_{x_3,x_4(i)} \right. \\
&\quad \left. - \tilde{\rho}_{x_1,x_3(i)} \right); \\
C_{Q8} &= \frac{2}{\sigma_{x_1(i)}\tilde{\sigma}_{x_4(i)}} \left( \tilde{\rho}_{x_1,x_4(i)}\tilde{\rho}_{x_2,x_3(i)}^2 - \rho_{x_1,x_2(i)}\tilde{\rho}_{x_2,x_3(i)}\tilde{\rho}_{x_3,x_4(i)} \right. \\
&\quad \left. - \tilde{\rho}_{x_1,x_3(i)}\tilde{\rho}_{x_2,x_3(i)}\tilde{\rho}_{x_2,x_4(i)} + \rho_{x_1,x_2(i)}\tilde{\rho}_{x_2,x_4(i)} + \tilde{\rho}_{x_1,x_3(i)}\tilde{\rho}_{x_3,x_4(i)} \right. \\
&\quad \left. - \tilde{\rho}_{x_1,x_4(i)} \right); \\
C_{Q9} &= \frac{2}{\sigma_{x_2(i)}\tilde{\sigma}_{x_3(i)}} \left( \tilde{\rho}_{x_1,x_4(i)}^2\tilde{\rho}_{x_2,x_3(i)} - \rho_{x_1,x_2(i)}\tilde{\rho}_{x_1,x_4(i)}\tilde{\rho}_{x_3,x_4(i)} \right. \\
&\quad \left. - \tilde{\rho}_{x_1,x_3(i)}\tilde{\rho}_{x_1,x_4(i)}\tilde{\rho}_{x_2,x_4(i)} + \tilde{\rho}_{x_2,x_4(i)}\tilde{\rho}_{x_3,x_4(i)} + \rho_{x_1,x_2(i)}\tilde{\rho}_{x_1,x_3(i)} \right. \\
&\quad \left. - \tilde{\rho}_{x_2,x_3(i)} \right); \\
C_{Q10} &= \frac{2}{\sigma_{x_2(i)}\tilde{\sigma}_{x_4(i)}} \left( \tilde{\rho}_{x_1,x_3(i)}^2\tilde{\rho}_{x_2,x_4(i)} - \rho_{x_1,x_2(i)}\tilde{\rho}_{x_1,x_3(i)}\tilde{\rho}_{x_3,x_4(i)} \right. \\
&\quad \left. - \tilde{\rho}_{x_1,x_3(i)}\tilde{\rho}_{x_1,x_4(i)}\tilde{\rho}_{x_2,x_3(i)} + \tilde{\rho}_{x_2,x_3(i)}\tilde{\rho}_{x_3,x_4(i)} + \rho_{x_1,x_2(i)}\tilde{\rho}_{x_1,x_4(i)} \right. \\
&\quad \left. - \tilde{\rho}_{x_2,x_4(i)} \right);
\end{aligned}$$

$$C_{Q11} = \frac{2}{\tilde{\sigma}_{x_3(i)}\tilde{\sigma}_{x_4(i)}} \left( \rho_{x_1,x_2(i)}^2 \tilde{\rho}_{x_3,x_4(i)} - \rho_{x_1,x_2(i)}\tilde{\rho}_{x_1,x_4(i)}\tilde{\rho}_{x_2,x_3(i)} \right. \\ \left. - \rho_{x_1,x_2(i)}\tilde{\rho}_{x_1,x_3(i)}\tilde{\rho}_{x_2,x_4(i)} + \tilde{\rho}_{x_2,x_3(i)}\tilde{\rho}_{x_2,x_4(i)} + \tilde{\rho}_{x_1,x_3(i)}\tilde{\rho}_{x_1,x_4(i)} \right. \\ \left. - \tilde{\rho}_{x_3,x_4(i)} \right).$$

In Eq. (S1),  $\mu_{x_1(i)}$  is the mean of  $x_1$  in the  $i$ th component,  $\mu_{x_2(i)}$  is the mean of  $x_2$  in the  $i$ th component,  $\tilde{\mu}_{x_3(i)}$  is the mean of  $\ln x_3$  in the  $i$ th component, and  $\tilde{\mu}_{x_4(i)}$  is the mean of  $\ln x_4$  in the  $i$ th component. The  $i$ th component standard deviation of  $x_1$  is  $\sigma_{x_1(i)}$ , the  $i$ th component standard deviation of  $x_2$  is  $\sigma_{x_2(i)}$ , the  $i$ th component standard deviation of  $\ln x_3$  is  $\tilde{\sigma}_{x_3(i)}$ , and the  $i$ th component standard deviation of  $\ln x_4$  is  $\tilde{\sigma}_{x_4(i)}$ . The  $i$ th component correlation of  $x_1$  and  $x_2$  is  $\rho_{x_1,x_2(i)}$ , the  $i$ th component correlation of  $x_1$  and  $\ln x_3$  is  $\tilde{\rho}_{x_1,x_3(i)}$ , the  $i$ th component correlation of  $x_1$  and  $\ln x_4$  is  $\tilde{\rho}_{x_1,x_4(i)}$ , the  $i$ th component correlation of  $x_2$  and  $\ln x_3$  is  $\tilde{\rho}_{x_2,x_3(i)}$ , the  $i$ th component correlation of  $x_2$  and  $\ln x_4$  is  $\tilde{\rho}_{x_2,x_4(i)}$ , and the  $i$ th component correlation of  $\ln x_3$  and  $\ln x_4$  is  $\tilde{\rho}_{x_3,x_4(i)}$ .

## S2 Functional Form of Trivariate PDFs

There are two types of trivariate PDFs used in the equation set. The first one is a trivariate normal-normal-lognormal distribution, meaning that the individual marginal of  $x_1$  is a normal distribution, the individual marginal of  $x_2$  is a normal distribution, and the individual marginal of  $x_3$  is a lognormal distribution. The functional form of this type of PDF is given by:

$$P_{NNL(i)}(x_1, x_2, x_3) = \frac{\exp\left\{-\frac{1}{2}\lambda_{NNL}\right\}}{(2\pi)^{\frac{3}{2}}\sigma_{x_1(i)}\sigma_{x_2(i)}\tilde{\sigma}_{x_3(i)}C_{T1}x_3}; \quad (\text{S2})$$

where:

$$\begin{aligned} \lambda_{NNL} = \frac{1}{C_{T1}^2} & \left[ C_{T2} (x_1 - \mu_{x_1(i)})^2 + C_{T3} (x_2 - \mu_{x_2(i)})^2 + C_{T4} (\ln x_3 - \tilde{\mu}_{x_3(i)})^2 \right. \\ & + C_{T5} (x_1 - \mu_{x_1(i)}) (x_2 - \mu_{x_2(i)}) + C_{T6} (x_1 - \mu_{x_1(i)}) (\ln x_3 - \tilde{\mu}_{x_3(i)}) \\ & \left. + C_{T7} (x_2 - \mu_{x_2(i)}) (\ln x_3 - \tilde{\mu}_{x_3(i)}) \right]; \end{aligned}$$

and where:

$$\begin{aligned} C_{T1} &= \left[ 1 - (\rho_{x_1, x_2(i)}^2 + \tilde{\rho}_{x_1, x_3(i)}^2 + \tilde{\rho}_{x_2, x_3(i)}^2) + 2\rho_{x_1, x_2(i)}\tilde{\rho}_{x_1, x_3(i)}\tilde{\rho}_{x_2, x_3(i)} \right]^{\frac{1}{2}}; \\ C_{T2} &= \frac{1 - \tilde{\rho}_{x_2, x_3(i)}^2}{\sigma_{x_1(i)}^2}; \quad C_{T3} = \frac{1 - \tilde{\rho}_{x_1, x_3(i)}^2}{\sigma_{x_2(i)}^2}; \quad C_{T4} = \frac{1 - \rho_{x_1, x_2(i)}^2}{\tilde{\sigma}_{x_3(i)}^2}; \\ C_{T5} &= \frac{2(\tilde{\rho}_{x_1, x_3(i)}\tilde{\rho}_{x_2, x_3(i)} - \rho_{x_1, x_2(i)})}{\sigma_{x_1(i)}\sigma_{x_2(i)}}; \quad C_{T6} = \frac{2(\rho_{x_1, x_2(i)}\tilde{\rho}_{x_2, x_3(i)} - \tilde{\rho}_{x_1, x_3(i)})}{\sigma_{x_1(i)}\tilde{\sigma}_{x_3(i)}}; \\ \text{and} \quad C_{T7} &= \frac{2(\rho_{x_1, x_2(i)}\tilde{\rho}_{x_1, x_3(i)} - \tilde{\rho}_{x_2, x_3(i)})}{\sigma_{x_2(i)}\tilde{\sigma}_{x_3(i)}}. \end{aligned}$$

In Eq. (S2),  $\mu_{x_1(i)}$  is the mean of  $x_1$  in the  $i$ th component,  $\mu_{x_2(i)}$  is the mean of  $x_2$  in the  $i$ th component, and  $\tilde{\mu}_{x_3(i)}$  is the mean of  $\ln x_3$  in the  $i$ th component. The  $i$ th component standard deviation of  $x_1$  is  $\sigma_{x_1(i)}$ , the  $i$ th component standard deviation of  $x_2$  is  $\sigma_{x_2(i)}$ , and the  $i$ th component standard deviation of  $\ln x_3$  is  $\tilde{\sigma}_{x_3(i)}$ . The  $i$ th component correlation of  $x_1$  and  $x_2$  is  $\rho_{x_1, x_2(i)}$ , the  $i$ th component correlation of  $x_1$  and  $\ln x_3$  is  $\tilde{\rho}_{x_1, x_3(i)}$ , and the  $i$ th component correlation of  $x_2$  and  $\ln x_3$  is  $\tilde{\rho}_{x_2, x_3(i)}$ .

The second type of trivariate PDF used in the equation set is a trivariate normal-lognormal-lognormal distribution, meaning that the individual marginal of  $x_1$  is a normal distribution, the individual marginal of  $x_2$  is a lognormal distribution, and the individual marginal of  $x_3$  is a lognormal distribution. The functional form of this type of PDF is given

by:

$$P_{NLL(i)}(x_1, x_2, x_3) = \frac{\exp\left\{-\frac{1}{2}\lambda_{NLL}\right\}}{(2\pi)^{\frac{3}{2}}\sigma_{x_1(i)}\tilde{\sigma}_{x_2(i)}\tilde{\sigma}_{x_3(i)}C_{t1}x_2x_3}; \quad (\text{S3})$$

where:

$$\begin{aligned} \lambda_{NLL} = \frac{1}{C_{t1}^2} & \left[ C_{t2} (x_1 - \mu_{x_1(i)})^2 + C_{t3} (\ln x_2 - \tilde{\mu}_{x_2(i)})^2 + C_{t4} (\ln x_3 - \tilde{\mu}_{x_3(i)})^2 \right. \\ & + C_{t5} (x_1 - \mu_{x_1(i)}) (\ln x_2 - \tilde{\mu}_{x_2(i)}) + C_{t6} (x_1 - \mu_{x_1(i)}) (\ln x_3 - \tilde{\mu}_{x_3(i)}) \\ & \left. + C_{t7} (\ln x_2 - \tilde{\mu}_{x_2(i)}) (\ln x_3 - \tilde{\mu}_{x_3(i)}) \right]; \end{aligned}$$

and where:

$$C_{t1} = \left[ 1 - (\tilde{\rho}_{x_1, x_2(i)}^2 + \tilde{\rho}_{x_1, x_3(i)}^2 + \tilde{\rho}_{x_2, x_3(i)}^2) + 2\tilde{\rho}_{x_1, x_2(i)}\tilde{\rho}_{x_1, x_3(i)}\tilde{\rho}_{x_2, x_3(i)} \right]^{\frac{1}{2}};$$

$$C_{t2} = \frac{1 - \tilde{\rho}_{x_2, x_3(i)}^2}{\sigma_{x_1(i)}^2}; \quad C_{t3} = \frac{1 - \tilde{\rho}_{x_1, x_3(i)}^2}{\tilde{\sigma}_{x_2(i)}^2}; \quad C_{t4} = \frac{1 - \tilde{\rho}_{x_1, x_2(i)}^2}{\tilde{\sigma}_{x_3(i)}^2};$$

$$C_{t5} = \frac{2(\tilde{\rho}_{x_1, x_3(i)}\tilde{\rho}_{x_2, x_3(i)} - \tilde{\rho}_{x_1, x_2(i)})}{\sigma_{x_1(i)}\tilde{\sigma}_{x_2(i)}}; \quad C_{t6} = \frac{2(\tilde{\rho}_{x_1, x_2(i)}\tilde{\rho}_{x_2, x_3(i)} - \tilde{\rho}_{x_1, x_3(i)})}{\sigma_{x_1(i)}\tilde{\sigma}_{x_3(i)}};$$

$$\text{and} \quad C_{t7} = \frac{2(\tilde{\rho}_{x_1, x_2(i)}\tilde{\rho}_{x_1, x_3(i)} - \tilde{\rho}_{x_2, x_3(i)})}{\tilde{\sigma}_{x_2(i)}\tilde{\sigma}_{x_3(i)}}.$$

In Eq. (S3),  $\mu_{x_1(i)}$  is the mean of  $x_1$  in the  $i$ th component,  $\tilde{\mu}_{x_2(i)}$  is the mean of  $\ln x_2$  in the  $i$ th component, and  $\tilde{\mu}_{x_3(i)}$  is the mean of  $\ln x_3$  in the  $i$ th component. The  $i$ th component standard deviation of  $x_1$  is  $\sigma_{x_1(i)}$ , the  $i$ th component standard deviation of  $\ln x_2$  is  $\tilde{\sigma}_{x_2(i)}$ , and the  $i$ th component standard deviation of  $\ln x_3$  is  $\tilde{\sigma}_{x_3(i)}$ . The  $i$ th component correlation of  $x_1$  and  $\ln x_2$  is  $\tilde{\rho}_{x_1, x_2(i)}$ , the  $i$ th component correlation of  $x_1$  and  $\ln x_3$  is  $\tilde{\rho}_{x_1, x_3(i)}$ , and the  $i$ th component correlation of  $\ln x_2$  and  $\ln x_3$  is  $\tilde{\rho}_{x_2, x_3(i)}$ .

### S3 Functional Form of Bivariate PDFs

There are three types of bivariate PDFs used in the equation set. The first one is a bivariate normal distribution, meaning that the individual marginal for each of  $x_1$  and  $x_2$  is a normal distribution. The functional form of this type of PDF is given by:

$$P_{NN(i)}(x_1, x_2) = \frac{\exp\left\{-\frac{1}{2}\lambda_{NN}\right\}}{2\pi\sigma_{x_1(i)}\sigma_{x_2(i)}\left(1-\rho_{x_1,x_2(i)}^2\right)^{\frac{1}{2}}}; \quad \text{where} \quad (\text{S4})$$

$$\lambda_{NN} = \frac{1}{1-\rho_{x_1,x_2(i)}^2} \left[ \frac{1}{\sigma_{x_1(i)}^2} (x_1 - \mu_{x_1(i)})^2 + \frac{1}{\sigma_{x_2(i)}^2} (x_2 - \mu_{x_2(i)})^2 - \frac{2\rho_{x_1,x_2(i)}}{\sigma_{x_1(i)}\sigma_{x_2(i)}} (x_1 - \mu_{x_1(i)}) (x_2 - \mu_{x_2(i)}) \right];$$

where the  $i$ th component mean of  $x_1$  is  $\mu_{x_1(i)}$ , the  $i$ th component mean of  $x_2$  is  $\mu_{x_2(i)}$ , the  $i$ th component standard deviation of  $x_1$  is  $\sigma_{x_1(i)}$ , the  $i$ th component standard deviation of  $x_2$  is  $\sigma_{x_2(i)}$ , and the  $i$ th component correlation of  $x_1$  and  $x_2$  is  $\rho_{x_1,x_2(i)}$ .

The second type of bivariate PDF used in the equation set is a bivariate normal-lognormal distribution, meaning that the individual marginal of  $x_1$  is a normal distribution and the individual marginal of  $x_2$  is a lognormal distribution. The functional form of this type of PDF is given by:

$$P_{NL(i)}(x_1, x_2) = \frac{\exp\left\{-\frac{1}{2}\lambda_{NL}\right\}}{2\pi\sigma_{x_1(i)}\tilde{\sigma}_{x_2(i)}\left(1-\tilde{\rho}_{x_1,x_2(i)}^2\right)^{\frac{1}{2}}x_2}; \quad \text{where} \quad (\text{S5})$$

$$\lambda_{NL} = \frac{1}{1-\tilde{\rho}_{x_1,x_2(i)}^2} \left[ \frac{1}{\sigma_{x_1(i)}^2} (x_1 - \mu_{x_1(i)})^2 + \frac{1}{\tilde{\sigma}_{x_2(i)}^2} (\ln x_2 - \tilde{\mu}_{x_2(i)})^2 - \frac{2\tilde{\rho}_{x_1,x_2(i)}}{\sigma_{x_1(i)}\tilde{\sigma}_{x_2(i)}} (x_1 - \mu_{x_1(i)}) (\ln x_2 - \tilde{\mu}_{x_2(i)}) \right];$$

where the  $i$ th component mean of  $x_1$  is  $\mu_{x_1(i)}$ , the  $i$ th component mean of  $\ln x_2$  is  $\tilde{\mu}_{x_2(i)}$ , the  $i$ th component standard deviation of  $x_1$  is  $\sigma_{x_1(i)}$ , the  $i$ th component standard deviation of

$\ln x_2$  is  $\tilde{\sigma}_{x_2(i)}$ , and the  $i$ th component correlation of  $x_1$  and  $\ln x_2$  is  $\tilde{\rho}_{x_1, x_2(i)}$ .

The third type of bivariate PDF used in the equation set is a bivariate lognormal distribution, meaning that the individual marginal for each of  $x_1$  and  $x_2$  is a lognormal distribution. The functional form of this type of PDF is given by:

$$P_{LL(i)}(x_1, x_2) = \frac{\exp\left\{-\frac{1}{2}\lambda_{LL}\right\}}{2\pi\tilde{\sigma}_{x_1(i)}\tilde{\sigma}_{x_2(i)}\left(1 - \tilde{\rho}_{x_1, x_2(i)}^2\right)^{\frac{1}{2}}x_1x_2}; \quad \text{where} \quad (\text{S6})$$

$$\lambda_{LL} = \frac{1}{1 - \tilde{\rho}_{x_1, x_2(i)}^2} \left[ \frac{1}{\tilde{\sigma}_{x_1(i)}^2} (\ln x_1 - \tilde{\mu}_{x_1(i)})^2 + \frac{1}{\tilde{\sigma}_{x_2(i)}^2} (\ln x_2 - \tilde{\mu}_{x_2(i)})^2 - \frac{2\tilde{\rho}_{x_1, x_2(i)}}{\tilde{\sigma}_{x_1(i)}\tilde{\sigma}_{x_2(i)}} (\ln x_1 - \tilde{\mu}_{x_1(i)}) (\ln x_2 - \tilde{\mu}_{x_2(i)}) \right];$$

where the  $i$ th component mean of  $\ln x_1$  is  $\tilde{\mu}_{x_1(i)}$ , the  $i$ th component mean of  $\ln x_2$  is  $\tilde{\mu}_{x_2(i)}$ , the  $i$ th component standard deviation of  $\ln x_1$  is  $\tilde{\sigma}_{x_1(i)}$ , the  $i$ th component standard deviation of  $\ln x_2$  is  $\tilde{\sigma}_{x_2(i)}$ , and the  $i$ th component correlation of  $\ln x_1$  and  $\ln x_2$  is  $\tilde{\rho}_{x_1, x_2(i)}$ .

## S4 Functional Form of Single-Variable PDFs

There are two types of single-variable (univariate) PDFs used in the equation set. The first one is a normal distribution. The functional form of this type of PDF is given by:

$$P_{N(i)}(x) = \frac{1}{(2\pi)^{\frac{1}{2}}\sigma_{x(i)}} \exp\left\{-\frac{(x - \mu_{x(i)})^2}{2\sigma_{x(i)}^2}\right\}; \quad (\text{S7})$$

where the  $i$ th component mean of  $x$  is  $\mu_{x(i)}$  and the  $i$ th component standard deviation of  $x$  is  $\sigma_{x(i)}$ . The second type of univariate PDF used in this equation set is a lognormal distribution. If the natural logarithm was taken for every point in a lognormal distribution, the resulting distribution would be a normal distribution. The functional form of this type

of PDF is given by:

$$P_{L(i)}(x) = \frac{1}{(2\pi)^{\frac{1}{2}} \tilde{\sigma}_{x(i)} x} \exp \left\{ \frac{-(\ln x - \tilde{\mu}_{x(i)})^2}{2 \tilde{\sigma}_{x(i)}^2} \right\}; \quad (\text{S8})$$

where the  $i$ th component mean of  $\ln x$  is  $\tilde{\mu}_{x(i)}$  and the  $i$ th component standard deviation of  $\ln x$  is  $\tilde{\sigma}_{x(i)}$ .



## S5 Quadrivariate PDF Integrals of Covariance Form

The integrals of the general form

$$G_{QC} = \int_{-\infty}^{\infty} \int_{-\infty}^{\infty} \int_0^{\infty} \int_0^{\infty} (x_1 - C_1) \left( x_2^\alpha (H(-x_2))^\alpha x_3^\beta x_4^\gamma - C_2 \right) \\ \times P_{NNLL}(x_1, x_2, x_3, x_4) dx_4 dx_3 dx_2 dx_1$$

are referred to as quadrivariate PDF integrals of covariance form. Both  $C_1$  and  $C_2$  are constants, and when they both represent the appropriate overall mean values, the resulting integral is a covariance. The quadrivariate PDF,  $P_{NNLL}(x_1, x_2, x_3, x_4)$ , is a normal-normal-lognormal-lognormal PDF, meaning that the individual marginals of both  $x_1$  and  $x_2$  are normal distributions and the individual marginals of both  $x_3$  and  $x_4$  are lognormal distributions. The Heaviside step function is denoted  $H(x)$ . The above integral has 16 sub-forms. When one or more of the variables is constant (has a standard deviation of 0), the integral simplifies and reduces.

In the solutions below, denoted  $G_{QC}$ ,  $\mu_{x_1}$  and  $\sigma_{x_1}$  denote the mean and standard deviation of  $x_1$  in the quadrivariate PDF,  $\mu_{x_2}$  and  $\sigma_{x_2}$  denote the mean and standard deviation of  $x_2$  in the quadrivariate PDF,  $\mu_{x_3}$  and  $\sigma_{x_3}$  denote the mean and standard deviation of  $x_3$  in the quadrivariate PDF, and  $\mu_{x_4}$  and  $\sigma_{x_4}$  denote the mean and standard deviation of  $x_4$  in the quadrivariate PDF. For lognormal variates,  $\tilde{\mu}_{x_3}$  and  $\tilde{\sigma}_{x_3}$  denote the mean and standard deviation of  $\ln x_3$  in the quadrivariate PDF, while  $\tilde{\mu}_{x_4}$  and  $\tilde{\sigma}_{x_4}$  denote the mean and standard deviation of  $\ln x_4$  in the quadrivariate PDF. The correlation of  $x_1$  and  $x_2$  is denoted  $\rho_{x_1, x_2}$ , the correlation of  $x_1$  and  $\ln x_3$  is denoted  $\tilde{\rho}_{x_1, x_3}$ , the correlation of  $x_1$  and  $\ln x_4$  is denoted  $\tilde{\rho}_{x_1, x_4}$ , the correlation of  $x_2$  and  $\ln x_3$  is denoted  $\tilde{\rho}_{x_2, x_3}$ , the correlation of  $x_2$  and  $\ln x_4$  is denoted  $\tilde{\rho}_{x_2, x_4}$ , and the correlation of  $\ln x_3$  and  $\ln x_4$  is denoted  $\tilde{\rho}_{x_3, x_4}$ . The gamma function is denoted  $\Gamma(x)$  and the parabolic cylinder function of order  $\nu$  is denoted  $D_\nu(x)$ .

When  $x_1, x_2, x_3,$  and  $x_4$  all vary ( $\sigma_{x_1} > 0, \sigma_{x_2} > 0, \sigma_{x_3} > 0,$  and  $\sigma_{x_4} > 0$ ), the solution is

$$\begin{aligned}
G_{QC} = & \frac{1}{\sqrt{2\pi}} (-\sigma_{x_2})^\alpha \exp \left\{ \tilde{\mu}_{x_3} \beta + \tilde{\mu}_{x_4} \gamma + \frac{1}{2} (1 - \tilde{\rho}_{x_2, x_3}^2) \tilde{\sigma}_{x_3}^2 \beta^2 \right. \\
& \left. + \frac{1}{2} (1 - \tilde{\rho}_{x_2, x_4}^2) \tilde{\sigma}_{x_4}^2 \gamma^2 + (\tilde{\rho}_{x_3, x_4} - \tilde{\rho}_{x_2, x_3} \tilde{\rho}_{x_2, x_4}) \tilde{\sigma}_{x_3} \beta \tilde{\sigma}_{x_4} \gamma \right\} \\
& \times \exp \left\{ \frac{1}{4} \varsigma^2 - \frac{\mu_{x_2}}{\sigma_{x_2}} \varsigma + \frac{1}{2} \frac{\mu_{x_2}^2}{\sigma_{x_2}^2} \right\} \\
& \times \left( -\rho_{x_1, x_2} \sigma_{x_1} \Gamma(\alpha + 2) D_{-(\alpha+2)}(\varsigma) \right. \\
& \quad + \left( \mu_{x_1} - C_1 - \frac{\mu_{x_2}}{\sigma_{x_2}} \rho_{x_1, x_2} \sigma_{x_1} + (\tilde{\rho}_{x_1, x_3} - \rho_{x_1, x_2} \tilde{\rho}_{x_2, x_3}) \sigma_{x_1} \tilde{\sigma}_{x_3} \beta \right. \\
& \quad \left. \left. + (\tilde{\rho}_{x_1, x_4} - \rho_{x_1, x_2} \tilde{\rho}_{x_2, x_4}) \sigma_{x_1} \tilde{\sigma}_{x_4} \gamma \right) \Gamma(\alpha + 1) D_{-(\alpha+1)}(\varsigma) \right) \\
& - C_2 (\mu_{x_1} - C_1);
\end{aligned} \tag{S9}$$

where  $\varsigma = \frac{\mu_{x_2}}{\sigma_{x_2}} + \tilde{\rho}_{x_2, x_3} \tilde{\sigma}_{x_3} \beta + \tilde{\rho}_{x_2, x_4} \tilde{\sigma}_{x_4} \gamma$ .

There are four sub-forms that contain one constant variable. When  $x_1$  is constant, but  $x_2, x_3,$  and  $x_4$  vary, the solution is

$$\begin{aligned}
G_{QC} = & \frac{1}{\sqrt{2\pi}} (\mu_{x_1} - C_1) (-\sigma_{x_2})^\alpha \\
& \times \exp \left\{ \tilde{\mu}_{x_3} \beta + \tilde{\mu}_{x_4} \gamma + \frac{1}{2} (1 - \tilde{\rho}_{x_2, x_3}^2) \tilde{\sigma}_{x_3}^2 \beta^2 \right. \\
& \quad \left. + \frac{1}{2} (1 - \tilde{\rho}_{x_2, x_4}^2) \tilde{\sigma}_{x_4}^2 \gamma^2 + (\tilde{\rho}_{x_3, x_4} - \tilde{\rho}_{x_2, x_3} \tilde{\rho}_{x_2, x_4}) \tilde{\sigma}_{x_3} \beta \tilde{\sigma}_{x_4} \gamma \right\} \\
& \times \exp \left\{ \frac{1}{4} \varsigma^2 - \frac{\mu_{x_2}}{\sigma_{x_2}} \varsigma + \frac{1}{2} \frac{\mu_{x_2}^2}{\sigma_{x_2}^2} \right\} \Gamma(\alpha + 1) D_{-(\alpha+1)}(\varsigma) \\
& - C_2 (\mu_{x_1} - C_1);
\end{aligned} \tag{S10}$$

where  $\varsigma = \frac{\mu_{x_2}}{\sigma_{x_2}} + \tilde{\rho}_{x_2, x_3} \tilde{\sigma}_{x_3} \beta + \tilde{\rho}_{x_2, x_4} \tilde{\sigma}_{x_4} \gamma$ .

When  $x_2$  is constant, but  $x_1$ ,  $x_3$ , and  $x_4$  vary, the solution is

$$G_{QC} = \begin{cases} \mu_{x_2}^\alpha \left( \mu_{x_1} - C_1 + \tilde{\rho}_{x_1, x_3} \sigma_{x_1} \tilde{\sigma}_{x_3} \beta + \tilde{\rho}_{x_1, x_4} \sigma_{x_1} \tilde{\sigma}_{x_4} \gamma \right) \\ \times \exp \left\{ \tilde{\mu}_{x_3} \beta + \tilde{\mu}_{x_4} \gamma + \frac{1}{2} \tilde{\sigma}_{x_3}^2 \beta^2 + \frac{1}{2} \tilde{\sigma}_{x_4}^2 \gamma^2 + \tilde{\rho}_{x_3, x_4} \tilde{\sigma}_{x_3} \beta \tilde{\sigma}_{x_4} \gamma \right\} \\ - C_2 (\mu_{x_1} - C_1), \quad \text{when } \mu_{x_2} \leq 0; \text{ and} \\ - C_2 (\mu_{x_1} - C_1), \quad \text{when } \mu_{x_2} > 0. \end{cases} \quad (\text{S11})$$

When  $x_3$  is constant, but  $x_1$ ,  $x_2$ , and  $x_4$  vary, the solution is

$$G_{QC} = \frac{1}{\sqrt{2\pi}} (-\sigma_{x_2})^\alpha \mu_{x_3}^\beta \exp \left\{ \tilde{\mu}_{x_4} \gamma + \frac{1}{2} \tilde{\sigma}_{x_4}^2 \gamma^2 - \frac{1}{4} \varsigma^2 \right\} \\ \times \left( -\rho_{x_1, x_2} \sigma_{x_1} \Gamma(\alpha + 2) D_{-(\alpha+2)}(\varsigma) \right. \\ \left. + \left( \mu_{x_1} - C_1 - \frac{\mu_{x_2}}{\sigma_{x_2}} \rho_{x_1, x_2} \sigma_{x_1} + (\tilde{\rho}_{x_1, x_4} - \rho_{x_1, x_2} \tilde{\rho}_{x_2, x_4}) \sigma_{x_1} \tilde{\sigma}_{x_4} \gamma \right) \right. \\ \left. \times \Gamma(\alpha + 1) D_{-(\alpha+1)}(\varsigma) \right) \\ - C_2 (\mu_{x_1} - C_1); \quad (\text{S12})$$

where  $\varsigma = \frac{\mu_{x_2}}{\sigma_{x_2}} + \tilde{\rho}_{x_2, x_4} \tilde{\sigma}_{x_4} \gamma$ .

When  $x_4$  is constant, but  $x_1$ ,  $x_2$ , and  $x_3$  vary, the solution is

$$\begin{aligned}
G_{QC} &= \frac{1}{\sqrt{2\pi}} (-\sigma_{x_2})^\alpha \mu_{x_4}^\gamma \exp \left\{ \tilde{\mu}_{x_3} \beta + \frac{1}{2} \tilde{\sigma}_{x_3}^2 \beta^2 - \frac{1}{4} \varsigma^2 \right\} \\
&\times \left( -\rho_{x_1, x_2} \sigma_{x_1} \Gamma(\alpha + 2) D_{-(\alpha+2)}(\varsigma) \right. \\
&\quad \left. + \left( \mu_{x_1} - C_1 - \frac{\mu_{x_2}}{\sigma_{x_2}} \rho_{x_1, x_2} \sigma_{x_1} + (\tilde{\rho}_{x_1, x_3} - \rho_{x_1, x_2} \tilde{\rho}_{x_2, x_3}) \sigma_{x_1} \tilde{\sigma}_{x_3} \beta \right) \right. \\
&\quad \left. \times \Gamma(\alpha + 1) D_{-(\alpha+1)}(\varsigma) \right) \\
&- C_2 (\mu_{x_1} - C_1);
\end{aligned} \tag{S13}$$

where  $\varsigma = \frac{\mu_{x_2}}{\sigma_{x_2}} + \tilde{\rho}_{x_2, x_3} \tilde{\sigma}_{x_3} \beta$ .

There are six sub-forms that contain two constant variables. When both  $x_1$  and  $x_2$  are constant, but both  $x_3$  and  $x_4$  vary, the solution is

$$G_{QC} = \begin{cases} (\mu_{x_1} - C_1) \mu_{x_2}^\alpha \exp \left\{ \tilde{\mu}_{x_3} \beta + \tilde{\mu}_{x_4} \gamma + \frac{1}{2} \tilde{\sigma}_{x_3}^2 \beta^2 + \frac{1}{2} \tilde{\sigma}_{x_4}^2 \gamma^2 + \tilde{\rho}_{x_3, x_4} \tilde{\sigma}_{x_3} \beta \tilde{\sigma}_{x_4} \gamma \right\} \\ -C_2 (\mu_{x_1} - C_1), & \text{when } \mu_{x_2} \leq 0; \text{ and} \\ -C_2 (\mu_{x_1} - C_1), & \text{when } \mu_{x_2} > 0. \end{cases} \tag{S14}$$

When both  $x_1$  and  $x_3$  are constant, but both  $x_2$  and  $x_4$  vary, the solution is

$$\begin{aligned}
G_{QC} &= \frac{1}{\sqrt{2\pi}} (\mu_{x_1} - C_1) (-\sigma_{x_2})^\alpha \mu_{x_3}^\beta \exp \left\{ \tilde{\mu}_{x_4} \gamma + \frac{1}{2} \tilde{\sigma}_{x_4}^2 \gamma^2 - \frac{1}{4} \varsigma^2 \right\} \Gamma(\alpha + 1) D_{-(\alpha+1)}(\varsigma) \\
&- C_2 (\mu_{x_1} - C_1);
\end{aligned} \tag{S15}$$

where  $\varsigma = \frac{\mu_{x_2}}{\sigma_{x_2}} + \tilde{\rho}_{x_2, x_4} \tilde{\sigma}_{x_4} \gamma$ .

When both  $x_1$  and  $x_4$  are constant, but both  $x_2$  and  $x_3$  vary, the solution is

$$G_{QC} = \frac{1}{\sqrt{2\pi}} (\mu_{x_1} - C_1) (-\sigma_{x_2})^\alpha \mu_{x_4}^\gamma \exp \left\{ \tilde{\mu}_{x_3} \beta + \frac{1}{2} \tilde{\sigma}_{x_3}^2 \beta^2 - \frac{1}{4} \varsigma^2 \right\} \Gamma(\alpha + 1) D_{-(\alpha+1)}(\varsigma) - C_2 (\mu_{x_1} - C_1); \quad (\text{S16})$$

where  $\varsigma = \frac{\mu_{x_2}}{\sigma_{x_2}} + \tilde{\rho}_{x_2, x_3} \tilde{\sigma}_{x_3} \beta$ .

When both  $x_2$  and  $x_3$  are constant, but both  $x_1$  and  $x_4$  vary, the solution is

$$G_{QC} = \begin{cases} \mu_{x_2}^\alpha \mu_{x_3}^\beta (\mu_{x_1} - C_1 + \tilde{\rho}_{x_1, x_4} \sigma_{x_1} \tilde{\sigma}_{x_4} \gamma) \exp \left\{ \tilde{\mu}_{x_4} \gamma + \frac{1}{2} \tilde{\sigma}_{x_4}^2 \gamma^2 \right\} \\ -C_2 (\mu_{x_1} - C_1), & \text{when } \mu_{x_2} \leq 0; \text{ and} \\ -C_2 (\mu_{x_1} - C_1), & \text{when } \mu_{x_2} > 0. \end{cases} \quad (\text{S17})$$

When both  $x_2$  and  $x_4$  are constant, but both  $x_1$  and  $x_3$  vary, the solution is

$$G_{QC} = \begin{cases} \mu_{x_2}^\alpha \mu_{x_4}^\gamma (\mu_{x_1} - C_1 + \tilde{\rho}_{x_1, x_3} \sigma_{x_1} \tilde{\sigma}_{x_3} \beta) \exp \left\{ \tilde{\mu}_{x_3} \beta + \frac{1}{2} \tilde{\sigma}_{x_3}^2 \beta^2 \right\} \\ -C_2 (\mu_{x_1} - C_1), & \text{when } \mu_{x_2} \leq 0; \text{ and} \\ -C_2 (\mu_{x_1} - C_1), & \text{when } \mu_{x_2} > 0. \end{cases} \quad (\text{S18})$$

When both  $x_3$  and  $x_4$  are constant, but both  $x_1$  and  $x_2$  vary, the solution is

$$\begin{aligned}
G_{QC} = & \frac{1}{\sqrt{2\pi}} (-\sigma_{x_2})^\alpha \mu_{x_3}^\beta \mu_{x_4}^\gamma \exp \left\{ -\frac{1}{4} \frac{\mu_{x_2}^2}{\sigma_{x_2}^2} \right\} \\
& \times \left( -\rho_{x_1, x_2} \sigma_{x_1} \Gamma(\alpha + 2) D_{-(\alpha+2)} \left( \frac{\mu_{x_2}}{\sigma_{x_2}} \right) \right. \\
& \quad \left. + \left( \mu_{x_1} - C_1 - \frac{\mu_{x_2}}{\sigma_{x_2}} \rho_{x_1, x_2} \sigma_{x_1} \right) \Gamma(\alpha + 1) D_{-(\alpha+1)} \left( \frac{\mu_{x_2}}{\sigma_{x_2}} \right) \right) \\
& - C_2 (\mu_{x_1} - C_1).
\end{aligned} \tag{S19}$$

There are four sub-forms that contain three constant variables. When  $x_1$ ,  $x_2$ , and  $x_3$  are constant, but  $x_4$  varies, the solution is

$$G_{QC} = \begin{cases} (\mu_{x_1} - C_1) \mu_{x_2}^\alpha \mu_{x_3}^\beta \exp \left\{ \tilde{\mu}_{x_4} \gamma + \frac{1}{2} \tilde{\sigma}_{x_4}^2 \gamma^2 \right\} \\ -C_2 (\mu_{x_1} - C_1), & \text{when } \mu_{x_2} \leq 0; \text{ and} \\ -C_2 (\mu_{x_1} - C_1), & \text{when } \mu_{x_2} > 0. \end{cases} \tag{S20}$$

When  $x_1$ ,  $x_2$ , and  $x_4$  are constant, but  $x_3$  varies, the solution is

$$G_{QC} = \begin{cases} (\mu_{x_1} - C_1) \mu_{x_2}^\alpha \mu_{x_4}^\gamma \exp \left\{ \tilde{\mu}_{x_3} \beta + \frac{1}{2} \tilde{\sigma}_{x_3}^2 \beta^2 \right\} \\ -C_2 (\mu_{x_1} - C_1), & \text{when } \mu_{x_2} \leq 0; \text{ and} \\ -C_2 (\mu_{x_1} - C_1), & \text{when } \mu_{x_2} > 0. \end{cases} \tag{S21}$$

When  $x_1$ ,  $x_3$ , and  $x_4$  are constant, but  $x_2$  varies, the solution is

$$\begin{aligned}
G_{QC} = & \frac{1}{\sqrt{2\pi}} (\mu_{x_1} - C_1) (-\sigma_{x_2})^\alpha \mu_{x_3}^\beta \mu_{x_4}^\gamma \exp \left\{ -\frac{1}{4} \frac{\mu_{x_2}^2}{\sigma_{x_2}^2} \right\} \Gamma(\alpha + 1) D_{-(\alpha+1)} \left( \frac{\mu_{x_2}}{\sigma_{x_2}} \right) \\
& - C_2 (\mu_{x_1} - C_1).
\end{aligned} \tag{S22}$$

When  $x_2$ ,  $x_3$ , and  $x_4$  are constant, but  $x_1$  varies, the solution is

$$G_{QC} = \begin{cases} (\mu_{x_1} - C_1)(\mu_{x_2}^\alpha \mu_{x_3}^\beta \mu_{x_4}^\gamma - C_2), & \text{when } \mu_{x_2} \leq 0; \text{ and} \\ -C_2(\mu_{x_1} - C_1), & \text{when } \mu_{x_2} > 0. \end{cases} \quad (\text{S23})$$

When  $x_1$ ,  $x_2$ ,  $x_3$ , and  $x_4$  are all constant ( $\sigma_{x_1} = 0$ ,  $\sigma_{x_2} = 0$ ,  $\sigma_{x_3} = 0$ , and  $\sigma_{x_4} = 0$ ), the solution is

$$G_{QC} = \begin{cases} (\mu_{x_1} - C_1)(\mu_{x_2}^\alpha \mu_{x_3}^\beta \mu_{x_4}^\gamma - C_2), & \text{when } \mu_{x_2} \leq 0; \text{ and} \\ -C_2(\mu_{x_1} - C_1), & \text{when } \mu_{x_2} > 0. \end{cases} \quad (\text{S24})$$

## S6 Trivariate PDF Integrals of Covariance Form

The integrals of the general form

$$G_{TC} = \int_{-\infty}^{\infty} \int_{-\infty}^{\infty} \int_0^{\infty} (x_1 - C_1) \left( x_2^\alpha (H(x_2))^\alpha x_3^\beta - C_2 \right) P_{NNL}(x_1, x_2, x_3) dx_3 dx_2 dx_1$$

are referred to as trivariate PDF integrals of covariance form. Both  $C_1$  and  $C_2$  are constants, and when they both represent the appropriate overall mean values, the resulting integral is a covariance. The trivariate PDF,  $P_{NNL}(x_1, x_2, x_3)$ , is a normal-normal-lognormal PDF, meaning that the individual marginals of both  $x_1$  and  $x_2$  are normal distributions and the individual marginal of  $x_3$  is a lognormal distribution. The above integral has eight sub-forms. When one or more of the variables is constant (has a standard deviation of 0), the integral simplifies and reduces.

When  $x_1$ ,  $x_2$ , and  $x_3$  all vary ( $\sigma_{x_1} > 0$ ,  $\sigma_{x_2} > 0$ , and  $\sigma_{x_3} > 0$ ), the solution, denoted  $G_{TC}$ ,

is

$$\begin{aligned}
G_{TC} &= \frac{1}{\sqrt{2\pi}} \sigma_{x_2}^\alpha \exp \left\{ \tilde{\mu}_{x_3} \beta + \frac{1}{2} \tilde{\sigma}_{x_3}^2 \beta^2 - \frac{1}{4} \varsigma^2 \right\} \\
&\quad \times \left( \rho_{x_1, x_2} \sigma_{x_1} \Gamma(\alpha + 2) D_{-(\alpha+2)}(-\varsigma) \right. \\
&\quad \left. + \left( \mu_{x_1} - C_1 - \frac{\mu_{x_2}}{\sigma_{x_2}} \rho_{x_1, x_2} \sigma_{x_1} + (\tilde{\rho}_{x_1, x_3} - \rho_{x_1, x_2} \tilde{\rho}_{x_2, x_3}) \sigma_{x_1} \tilde{\sigma}_{x_3} \beta \right) \right. \\
&\quad \left. \times \Gamma(\alpha + 1) D_{-(\alpha+1)}(-\varsigma) \right) \\
&\quad - C_2 (\mu_{x_1} - C_1);
\end{aligned} \tag{S25}$$

where  $\varsigma = \frac{\mu_{x_2}}{\sigma_{x_2}} + \tilde{\rho}_{x_2, x_3} \tilde{\sigma}_{x_3} \beta$ .

There are three sub-forms that contain one constant variable. When  $x_1$  is constant, but  $x_2$  and  $x_3$  vary, the solution is

$$\begin{aligned}
G_{TC} &= \frac{1}{\sqrt{2\pi}} (\mu_{x_1} - C_1) \sigma_{x_2}^\alpha \exp \left\{ \tilde{\mu}_{x_3} \beta + \frac{1}{2} \tilde{\sigma}_{x_3}^2 \beta^2 - \frac{1}{4} \varsigma^2 \right\} \Gamma(\alpha + 1) D_{-(\alpha+1)}(-\varsigma) \\
&\quad - C_2 (\mu_{x_1} - C_1);
\end{aligned} \tag{S26}$$

where  $\varsigma = \frac{\mu_{x_2}}{\sigma_{x_2}} + \tilde{\rho}_{x_2, x_3} \tilde{\sigma}_{x_3} \beta$ .

When  $x_2$  is constant, but  $x_1$  and  $x_3$  vary, the solution is

$$G_{TC} = \begin{cases} \mu_{x_2}^\alpha (\mu_{x_1} - C_1 + \tilde{\rho}_{x_1, x_3} \sigma_{x_1} \tilde{\sigma}_{x_3} \beta) \exp \left\{ \tilde{\mu}_{x_3} \beta + \frac{1}{2} \tilde{\sigma}_{x_3}^2 \beta^2 \right\} \\ -C_2 (\mu_{x_1} - C_1), & \text{when } \mu_{x_2} \geq 0; \text{ and} \\ -C_2 (\mu_{x_1} - C_1), & \text{when } \mu_{x_2} < 0. \end{cases} \tag{S27}$$



When  $x_3$  is constant, but  $x_1$  and  $x_2$  vary, the solution is

$$\begin{aligned}
G_{TC} &= \frac{1}{\sqrt{2\pi}} \sigma_{x_2}^\alpha \mu_{x_3}^\beta \exp \left\{ -\frac{1}{4} \frac{\mu_{x_2}^2}{\sigma_{x_2}^2} \right\} \\
&\times \left( \rho_{x_1, x_2} \sigma_{x_1} \Gamma(\alpha + 2) D_{-(\alpha+2)} \left( -\frac{\mu_{x_2}}{\sigma_{x_2}} \right) \right. \\
&\quad \left. + \left( \mu_{x_1} - C_1 - \frac{\mu_{x_2}}{\sigma_{x_2}} \rho_{x_1, x_2} \sigma_{x_1} \right) \Gamma(\alpha + 1) D_{-(\alpha+1)} \left( -\frac{\mu_{x_2}}{\sigma_{x_2}} \right) \right) \\
&- C_2 (\mu_{x_1} - C_1).
\end{aligned} \tag{S28}$$

There are three sub-forms that contain two constant variables. When both  $x_1$  and  $x_2$  are constant, but  $x_3$  varies, the solution is

$$G_{TC} = \begin{cases} \mu_{x_2}^\alpha (\mu_{x_1} - C_1) \exp \left\{ \tilde{\mu}_{x_3} \beta + \frac{1}{2} \tilde{\sigma}_{x_3}^2 \beta^2 \right\} - C_2 (\mu_{x_1} - C_1), & \text{when } \mu_{x_2} \geq 0; \text{ and} \\ -C_2 (\mu_{x_1} - C_1), & \text{when } \mu_{x_2} < 0. \end{cases} \tag{S29}$$

When both  $x_1$  and  $x_3$  are constant, but  $x_2$  varies, the solution is

$$\begin{aligned}
G_{TC} &= \frac{1}{\sqrt{2\pi}} (\mu_{x_1} - C_1) \sigma_{x_2}^\alpha \mu_{x_3}^\beta \exp \left\{ -\frac{1}{4} \frac{\mu_{x_2}^2}{\sigma_{x_2}^2} \right\} \Gamma(\alpha + 1) D_{-(\alpha+1)} \left( -\frac{\mu_{x_2}}{\sigma_{x_2}} \right) \\
&- C_2 (\mu_{x_1} - C_1).
\end{aligned} \tag{S30}$$

When both  $x_2$  and  $x_3$  are constant, but  $x_1$  varies, the solution is

$$G_{TC} = \begin{cases} (\mu_{x_1} - C_1) (\mu_{x_2}^\alpha \mu_{x_3}^\beta - C_2), & \text{when } \mu_{x_2} \geq 0; \text{ and} \\ -C_2 (\mu_{x_1} - C_1), & \text{when } \mu_{x_2} < 0. \end{cases} \tag{S31}$$

When  $x_1$ ,  $x_2$ , and  $x_3$  are all constant ( $\sigma_{x_1} = 0$ ,  $\sigma_{x_2} = 0$ , and  $\sigma_{x_3} = 0$ ), the solution is

$$G_{TC} = \begin{cases} (\mu_{x_1} - C_1)(\mu_{x_2}^\alpha \mu_{x_3}^\beta - C_2), & \text{when } \mu_{x_2} \geq 0; \text{ and} \\ -C_2(\mu_{x_1} - C_1), & \text{when } \mu_{x_2} < 0. \end{cases} \quad (\text{S32})$$

## S7 Trivariate PDF Integrals of Mean Form

The integrals of the general form

$$\begin{aligned} G_{TM} &= \int_{-\infty}^{\infty} \int_0^{\infty} \int_0^{\infty} x_1^\alpha (H(-x_1))^\alpha x_2^\beta x_3^\gamma P_{NLL}(x_1, x_2, x_3) dx_3 dx_2 dx_1 \\ &= \int_{-\infty}^0 \int_0^{\infty} \int_0^{\infty} x_1^\alpha x_2^\beta x_3^\gamma P_{NLL}(x_1, x_2, x_3) dx_3 dx_2 dx_1 \end{aligned}$$

are referred to as trivariate PDF integrals of mean form. The trivariate PDF,  $P_{NLL}(x_1, x_2, x_3)$ , is a normal-lognormal-lognormal PDF, meaning that the individual marginal of  $x_1$  is a normal distribution and the individual marginals of both  $x_2$  and  $x_3$  are lognormal distributions. The above integral has eight sub-forms. When one or more of the variables is constant (has a standard deviation of 0), the integral simplifies and reduces.

In the solutions below, denoted  $G_{TM}$ ,  $\mu_{x_1}$  and  $\sigma_{x_1}$  denote the mean and standard deviation of  $x_1$  in the trivariate PDF,  $\mu_{x_2}$  and  $\sigma_{x_2}$  denote the mean and standard deviation of  $x_2$  in the trivariate PDF, and  $\mu_{x_3}$  and  $\sigma_{x_3}$  denote the mean and standard deviation of  $x_3$  in the trivariate PDF. For lognormal variates,  $\tilde{\mu}_{x_2}$  and  $\tilde{\sigma}_{x_2}$  denote the mean and standard deviation of  $\ln x_2$  in the trivariate PDF, while  $\tilde{\mu}_{x_3}$  and  $\tilde{\sigma}_{x_3}$  denote the mean and standard deviation of  $\ln x_3$  in the trivariate PDF. The correlation of  $x_1$  and  $\ln x_2$  is denoted  $\tilde{\rho}_{x_1, x_2}$ , the correlation of  $x_1$  and  $\ln x_3$  is denoted  $\tilde{\rho}_{x_1, x_3}$ , and the correlation of  $\ln x_2$  and  $\ln x_3$  is denoted  $\tilde{\rho}_{x_2, x_3}$ . The gamma function is denoted  $\Gamma(x)$  and the parabolic cylinder function of order  $\nu$  is denoted  $D_\nu(x)$ .

When  $x_1$ ,  $x_2$ , and  $x_3$  all vary ( $\sigma_{x_1} > 0$ ,  $\sigma_{x_2} > 0$ , and  $\sigma_{x_3} > 0$ ), the solution is

$$G_{TM} = \frac{1}{\sqrt{2\pi}} (-\sigma_{x_1})^\alpha \exp \left\{ \tilde{\mu}_{x_2} \beta + \tilde{\mu}_{x_3} \gamma + \frac{1}{2} (1 - \tilde{\rho}_{x_1, x_2}^2) \tilde{\sigma}_{x_2}^2 \beta^2 \right. \\ \left. + \frac{1}{2} (1 - \tilde{\rho}_{x_1, x_3}^2) \tilde{\sigma}_{x_3}^2 \gamma^2 + (\tilde{\rho}_{x_2, x_3} - \tilde{\rho}_{x_1, x_2} \tilde{\rho}_{x_1, x_3}) \tilde{\sigma}_{x_2} \beta \tilde{\sigma}_{x_3} \gamma \right\} \quad (\text{S33}) \\ \times \exp \left\{ \frac{1}{4} \varsigma^2 - \frac{\mu_{x_1}}{\sigma_{x_1}} \varsigma + \frac{1}{2} \frac{\mu_{x_1}^2}{\sigma_{x_1}^2} \right\} \Gamma(\alpha + 1) D_{-(\alpha+1)}(\varsigma);$$

where  $\varsigma = \frac{\mu_{x_1}}{\sigma_{x_1}} + \tilde{\rho}_{x_1, x_2} \tilde{\sigma}_{x_2} \beta + \tilde{\rho}_{x_1, x_3} \tilde{\sigma}_{x_3} \gamma$ .

There are three sub-forms that contain one constant variable. When  $x_1$  is constant, but  $x_2$  and  $x_3$  vary, the solution is

$$G_{TM} = \begin{cases} \mu_{x_1}^\alpha \exp \left\{ \tilde{\mu}_{x_2} \beta + \tilde{\mu}_{x_3} \gamma + \frac{1}{2} \tilde{\sigma}_{x_2}^2 \beta^2 + \frac{1}{2} \tilde{\sigma}_{x_3}^2 \gamma^2 + \tilde{\rho}_{x_2, x_3} \tilde{\sigma}_{x_2} \beta \tilde{\sigma}_{x_3} \gamma \right\}, \\ \text{when } \mu_{x_1} \leq 0; \text{ and} \\ 0, \text{ when } \mu_{x_1} > 0. \end{cases} \quad (\text{S34})$$

When  $x_2$  is constant, but  $x_1$  and  $x_3$  vary, the solution is

$$G_{TM} = \frac{1}{\sqrt{2\pi}} (-\sigma_{x_1})^\alpha \mu_{x_2}^\beta \exp \left\{ \tilde{\mu}_{x_3} \gamma + \frac{1}{2} \tilde{\sigma}_{x_3}^2 \gamma^2 - \frac{1}{4} \varsigma^2 \right\} \Gamma(\alpha + 1) D_{-(\alpha+1)}(\varsigma); \quad (\text{S35})$$

where  $\varsigma = \frac{\mu_{x_1}}{\sigma_{x_1}} + \tilde{\rho}_{x_1, x_3} \tilde{\sigma}_{x_3} \gamma$ .

When  $x_3$  is constant, but  $x_1$  and  $x_2$  vary, the solution is

$$G_{TM} = \frac{1}{\sqrt{2\pi}} (-\sigma_{x_1})^\alpha \mu_{x_3}^\gamma \exp \left\{ \tilde{\mu}_{x_2} \beta + \frac{1}{2} \tilde{\sigma}_{x_2}^2 \beta^2 - \frac{1}{4} \varsigma^2 \right\} \Gamma(\alpha + 1) D_{-(\alpha+1)}(\varsigma); \quad (\text{S36})$$

where  $\varsigma = \frac{\mu_{x_1}}{\sigma_{x_1}} + \tilde{\rho}_{x_1, x_2} \tilde{\sigma}_{x_2} \beta$ .

There are three sub-forms that contain two constant variables. When both  $x_1$  and  $x_2$  are

constant, but  $x_3$  varies, the solution is

$$G_{TM} = \begin{cases} \mu_{x_1}^\alpha \mu_{x_2}^\beta \exp \left\{ \tilde{\mu}_{x_3} \gamma + \frac{1}{2} \tilde{\sigma}_{x_3}^2 \gamma^2 \right\}, & \text{when } \mu_{x_1} \leq 0; \text{ and} \\ 0, & \text{when } \mu_{x_1} > 0. \end{cases} \quad (\text{S37})$$

When both  $x_1$  and  $x_3$  are constant, but  $x_2$  varies, the solution is

$$G_{TM} = \begin{cases} \mu_{x_1}^\alpha \mu_{x_3}^\gamma \exp \left\{ \tilde{\mu}_{x_2} \beta + \frac{1}{2} \tilde{\sigma}_{x_2}^2 \beta^2 \right\}, & \text{when } \mu_{x_1} \leq 0; \text{ and} \\ 0, & \text{when } \mu_{x_1} > 0. \end{cases} \quad (\text{S38})$$

When both  $x_2$  and  $x_3$  are constant, but  $x_1$  varies, the solution is

$$G_{TM} = \frac{1}{\sqrt{2\pi}} (-\sigma_{x_1})^\alpha \mu_{x_2}^\beta \mu_{x_3}^\gamma \exp \left\{ -\frac{1}{4} \frac{\mu_{x_1}^2}{\sigma_{x_1}^2} \right\} \Gamma(\alpha + 1) D_{-(\alpha+1)} \left( \frac{\mu_{x_1}}{\sigma_{x_1}} \right). \quad (\text{S39})$$

When  $x_1$ ,  $x_2$ , and  $x_3$  are all constant ( $\sigma_{x_1} = 0$ ,  $\sigma_{x_2} = 0$ , and  $\sigma_{x_3} = 0$ ), the solution is

$$G_{TM} = \begin{cases} \mu_{x_1}^\alpha \mu_{x_2}^\beta \mu_{x_3}^\gamma, & \text{when } \mu_{x_1} \leq 0; \text{ and} \\ 0, & \text{when } \mu_{x_1} > 0. \end{cases} \quad (\text{S40})$$

## S8 Bivariate PDF Integrals of Mean Form

The integrals of the general form

$$\begin{aligned} G_{BM} &= \int_{-\infty}^{\infty} \int_0^{\infty} x_1^\alpha (H(x_1))^\alpha x_2^\beta P_{NL}(x_1, x_2) dx_2 dx_1 \\ &= \int_0^{\infty} \int_0^{\infty} x_1^\alpha x_2^\beta P_{NL}(x_1, x_2) dx_2 dx_1 \end{aligned}$$

are referred to as bivariate PDF integrals of mean form. The bivariate PDF,  $P_{NL}(x_1, x_2)$ , is a normal-lognormal PDF, meaning that the individual marginal of  $x_1$  is a normal distribution and the individual marginal of  $x_2$  is a lognormal distribution. The above integral has four sub-forms. When one or more of the variables is constant (has a standard deviation of 0), the integral simplifies and reduces. In the solutions below, denoted  $G_{BM}$ , the notation is the same as in Section S7.

When both  $x_1$  and  $x_2$  vary ( $\sigma_{x_1} > 0$  and  $\sigma_{x_2} > 0$ ), the solution is

$$G_{BM} = \frac{1}{\sqrt{2\pi}} \sigma_{x_1}^\alpha \exp \left\{ \tilde{\mu}_{x_2} \beta + \frac{1}{2} \tilde{\sigma}_{x_2}^2 \beta^2 - \frac{1}{4} \varsigma^2 \right\} \Gamma(\alpha + 1) D_{-(\alpha+1)}(-\varsigma); \quad (\text{S41})$$

where  $\varsigma = \frac{\mu_{x_1}}{\sigma_{x_1}} + \tilde{\rho}_{x_1, x_2} \tilde{\sigma}_{x_2} \beta$ .

When  $x_1$  is constant, but  $x_2$  varies, the solution is

$$G_{BM} = \begin{cases} \mu_{x_1}^\alpha \exp \left\{ \tilde{\mu}_{x_2} \beta + \frac{1}{2} \tilde{\sigma}_{x_2}^2 \beta^2 \right\}, & \text{when } \mu_{x_1} \geq 0; \text{ and} \\ 0, & \text{when } \mu_{x_1} < 0. \end{cases} \quad (\text{S42})$$

When  $x_2$  is constant, but  $x_1$  varies, the solution is

$$G_{BM} = \frac{1}{\sqrt{2\pi}} \sigma_{x_1}^\alpha \mu_{x_2}^\beta \exp \left\{ -\frac{1}{4} \frac{\mu_{x_1}^2}{\sigma_{x_1}^2} \right\} \Gamma(\alpha + 1) D_{-(\alpha+1)} \left( -\frac{\mu_{x_1}}{\sigma_{x_1}} \right). \quad (\text{S43})$$

When both  $x_1$  and  $x_2$  are constant ( $\sigma_{x_1} = 0$  and  $\sigma_{x_2} = 0$ ), the solution is

$$G_{BM} = \begin{cases} \mu_{x_1}^\alpha \mu_{x_2}^\beta, & \text{when } \mu_{x_1} \geq 0; \text{ and} \\ 0, & \text{when } \mu_{x_1} < 0. \end{cases} \quad (\text{S44})$$
